# Supplementary material
Source: MDPI journal article supplement (https://www.mdpi.com/2073-4441/14/7/1033)
Supplement: s1 [file s1]

## Article

# Long-Term Study of Antibiotic Presence in Ebro River Basin (Spain): Identification of the Emission Sources

Samuel Moles <sup>1,\*</sup>, Sebastiano Gozzo <sup>1</sup>, María P. Ormad <sup>2</sup>, Rosa Mosteo <sup>2</sup>, Jairo Gómez <sup>3</sup>, Francisco Laborda <sup>4</sup> and Joanna Szpunar <sup>1</sup>

## Supplementary Materials:

**Table S1.** Sulfadiazine quantitative concentration results in surface control points (ng/L). D = detected (LOD < D < LOQ), n/d = not detected (<LOD).

| RIVER                     | SUB-BASIN | LOCATION               | SULFADIAZINE (ng/L) |             |             |             |             |             |
|---------------------------|-----------|------------------------|---------------------|-------------|-------------|-------------|-------------|-------------|
|                           |           |                        | Spring 2018         | Autumn 2018 | Spring 2019 | Autumn 2019 | Autumn 2020 | Spring 2021 |
| Segre River               | Segre     | Torres de Segre        | n/d                 | D           | D           | 5           | 120         | 9           |
| Noguera Ribagorzana River | Segre     | Corbins                | D                   | D           | D           | 28          | 214         | 118         |
| Clamor Amarga River       | Cinca     | Zaidín                 | 300                 | 19          | D           | 3           | 227         | 16          |
| Cinca River               | Cinca     | Fraga                  | n/d                 | D           | D           | 3           | 325         | 4           |
| Alcanadre River           | Alcanadre | Sariñena               | n/d                 | n/d         | D           | 8           | n/d         | 1           |
| Flumen River              | Alcanadre | Albalatillo            | D                   | 40          | D           | 2           | 95          | 30          |
| Gállego River             | Gallego   | San Mateo de Gállego   | n/d                 | D           | D           | 34          | 85          | 1           |
| Arba de Ríquel River      | Ebro      | Ejea de los Caballeros | D                   | n/d         | n/d         | 18          | 521         | 3           |
| Aragon Subordan River     | Aragón    | Javierregay            | n/d                 | n/d         | n/d         | n/d         | 50          | n/d         |
| Aragon River              | Aragón    | Caparroso              | n/d                 | n/d         | n/d         | 1           | 12          | n/d         |
| Irantzu River             | Ega       | Estella                | n/d                 | 21          | n/d         | 4           | 144         | 27          |
| Arakil River              | Arga      | Irañeta                | n/d                 | 23          | D           | 20          | 13          | 2           |
| Queiles River             | Arga      | Novallas               | D                   | n/d         | n/d         | 1.5         | 12          | 2           |
| Alhama River              | Alhama    | Alfaro                 | n/d                 | n/d         | n/d         | 2           | 13          | 3           |
| Ega River                 | Ega       | Estella                | D                   | n/d         | n/d         | 2           | 20          | 14          |
| Ega River                 | Ega       | Estella                | n/d                 | n/d         | D           | n/d         | 11          | n/d         |
| Arga River                | Arga      | Arazuri                | n/d                 | D           | 258         | 1.6         | n/d         | n/d         |
| Arga River                | Arga      | Ororbía                | D                   | 16          | D           | 2           | n/d         | 7           |
| Ebro River                | Ebro      | Fontellas              | D                   | D           | D           | 12          | n/d         | n/d         |
| Ebro River                | Ebro      | Tudela                 | n/d                 | n/d         | D           | 77          | n/d         | n/d         |

It should be taken in account that spring 2020 sampling campaign was postponed to autumn 2020 as a result of COVID-19.

**Table S2.** Enrofloxacin quantitative concentration results (ng/L) in surface control points (ng/L). D = detected (LOD < D < LOQ), n/d = not detected (<LOD).

| RIVER                     | SUB-BASIN | LOCATION               | ENROFLOXACIN (ng/L) |             |             |             |             |             |
|---------------------------|-----------|------------------------|---------------------|-------------|-------------|-------------|-------------|-------------|
|                           |           |                        | Spring 2018         | Autumn 2018 | Spring 2019 | Autumn 2019 | Autumn 2020 | Spring 2021 |
| Segre River               | Segre     | Torres de Segre        | 240                 | 140         | D           | 6           | 106         | 5           |
| Noguera Ribagorzana River | Segre     | Corbins                | 250                 | D           | 523         | 17          | 31          | 966         |
| Clamor Amarga River       | Cinca     | Zaidín                 | 350                 | D           | D           | 32          | 41          | 5           |
| Cinca River               | Cinca     | Fraga                  | 380                 | D           | D           | 5           | 28          | 2           |
| Alcanadre River           | Alcanadre | Sariñena               | n/d                 | D           | n/d         | n/d         | 11          | 2           |
| Flumen River              | Alcanadre | Albalatillo            | D                   | D           | D           | n/d         | 7           | 13          |
| Gállego River             | Gallego   | San Mateo de Gállego   | 1,560               | D           | D           | 11          | 88          | 3           |
| Arba de Ríquel River      | Ebro      | Ejea de los Caballeros | 4,390               | D           | D           | 314         | 107         | 4           |
| Aragon Subordan River     | Aragón    | Javierregay            | 240                 | n/d         | n/d         | n/d         | 8           | 2           |
| Aragon River              | Aragón    | Caparroso              | 280                 | D           | D           | n/d         | 15          | 3           |
| Irantzu River             | Ega       | Estella                | 240                 | n/d         | n/d         | n/d         | 11          | 15          |
| Arakil River              | Arga      | Irañeta                | 260                 | n/d         | n/d         | n/d         | n/d         | 7           |
| Queiles River             | Arga      | Novallas               | 250                 | D           | D           | 2           | n/d         | 2           |
| Alhama River              | Alhama    | Alfaro                 | 350                 | D           | n/d         | 3           | 18          | 7           |
| Ega River                 | Ega       | Estella                | 250                 | 2,920       | n/d         | n/d         | n/d         | 9           |
| Ega River                 | Ega       | Estella                | 240                 | 330         | n/d         | 1.5         | 15          | 2           |
| Arga River                | Arga      | Arazuri                | 590                 | 210         | D           | n/d         | 4           | 3           |
| Arga River                | Arga      | Ororbia                | 650                 | D           | D           | n/d         | n/d         | 13          |
| Ebro River                | Ebro      | Fontellas              | D                   | D           | 3,033       | n/d         | 42          | 11          |
| Ebro River                | Ebro      | Tudela                 | 240                 | D           | 672         | 200         | 39          | 4           |

It should be taken in account that spring 2020 sampling campaign was postponed to autumn 2020 as a result of COVID-19.

**Table S3.** Azithromycin quantitative concentration results (ng/L) in surface control points (ng/L). D = detected (LOD < D < LOQ), n/d = not detected (<LOD).

| RIVER                     | SUB-BASIN | LOCATION               | AZITHROMYCIN (ng/L) |             |             |             |             |             |
|---------------------------|-----------|------------------------|---------------------|-------------|-------------|-------------|-------------|-------------|
|                           |           |                        | Spring 2018         | Autumn 2018 | Spring 2019 | Autumn 2019 | Autumn 2020 | Spring 2021 |
| Segre River               | Segre     | Torres de Segre        | n/d                 | n/d         | D           | n/d         | 22          | 2           |
| Noguera Ribagorzana River | Segre     | Corbins                | n/d                 | n/d         | n/d         | n/d         | n/d         | 4           |
| Clamor Amarga River       | Cinca     | Zaidín                 | n/d                 | n/d         | n/d         | n/d         | n/d         | 4           |
| Cinca River               | Cinca     | Fraga                  | n/d                 | n/d         | D           | n/d         | n/d         | n/d         |
| Alcanadre River           | Alcanadre | Sariñena               | n/d                 | n/d         | D           | n/d         | n/d         | n/d         |
| Flumen River              | Alcanadre | Albalatillo            | n/d                 | n/d         | D           | n/d         | n/d         | 1           |
| Gállego River             | Gallego   | San Mateo de Gállego   | n/d                 | n/d         | n/d         | n/d         | n/d         | 1           |
| Arba de Ríquel River      | Ebro      | Ejea de los Caballeros | n/d                 | n/d         | n/d         | n/d         | n/d         | n/d         |

|                       |        |             |     |     |     |     |     |     |
|-----------------------|--------|-------------|-----|-----|-----|-----|-----|-----|
| Aragon Subordan River | Aragón | Javierregay | n/d | n/d | n/d | n/d | n/d | n/d |
| Aragon River          | Aragón | Caparroso   | n/d | n/d | n/d | n/d | n/d | n/d |
| Irantzu River         | Ega    | Estella     | n/d | n/d | D   | n/d | n/d | 1   |
| Arakil River          | Arga   | Irañeta     | n/d | n/d | n/d | n/d | n/d | n/d |
| Queiles River         | Arga   | Novallas    | n/d | n/d | D   | 22  | n/d | 1   |
| Alhama River          | Alhama | Alfaro      | n/d | n/d | n/d | 4   | n/d | 5   |
| Ega River             | Ega    | Estella     | n/d | n/d | n/d | 3   | n/d | 1   |
| Ega River             | Ega    | Estella     | n/d | n/d | D   | n/d | 12  | 2   |
| Arga River            | Arga   | Arazuri     | n/d | n/d | D   | n/d | n/d | 1   |
| Arga River            | Arga   | Ororbia     | n/d | 739 | D   | n/d | n/d | 0   |
| Ebro River            | Ebro   | Fontellas   | n/d | n/d | n/d | n/d | n/d | 5   |
| Ebro River            | Ebro   | Tudela      | n/d | n/d | n/d | n/d | n/d | 1   |

It should be taken in account that spring 2020 sampling campaign was postponed to autumn 2020 as a result of COVID-19.

**Table S4.** Trimethoprim quantitative concentration results (ng/L) in surface control points. D = detected (LOD<D<LOQ), n/d = not detected (<LOD).

| RIVER                     | SUB-BASIN | LOCATION               | TRIMETHOPRIM (ng/L) |             |             |             |             |             |
|---------------------------|-----------|------------------------|---------------------|-------------|-------------|-------------|-------------|-------------|
|                           |           |                        | Spring 2018         | Autumn 2018 | Spring 2019 | Autumn 2019 | Autumn 2020 | Spring 2021 |
| Segre River               | Segre     | Torres de Segre        | n/d                 | D           | D           | n/d         | 138         | 12          |
| Noguera Ribagorçana River | Segre     | Corbins                | n/d                 | n/d         | D           | 30          | 246         | 106         |
| Clamor Amarga River       | Cinca     | Zaidín                 | D                   | n/d         | D           | n/d         | 153         | 4           |
| Cinca River               | Cinca     | Fraga                  | n/d                 | D           | D           | n/d         | n/d         | 1           |
| Alcanadre River           | Alcanadre | Sariñena               | n/d                 | n/d         | D           | 5           | n/d         | n/d         |
| Flumen River              | Alcanadre | Albalatillo            | D                   | n/d         | D           | n/d         | n/d         | 1           |
| Gállego River             | Gallego   | San Mateo de Gállego   | n/d                 | D           | D           | 6           | n/d         | n/d         |
| Arba de Ríquel River      | Ebro      | Ejea de los Caballeros | n/d                 | D           | n/d         | 4           | n/d         | n/d         |
| Aragon Subordan River     | Aragón    | Javierregay            | n/d                 | n/d         | n/d         | n/d         | n/d         | 1           |
| Aragon River              | Aragón    | Caparroso              | n/d                 | n/d         | n/d         | n/d         | n/d         | 1           |
| Irantzu River             | Ega       | Estella                | n/d                 | D           | D           | n/d         | n/d         | 1           |
| Arakil River              | Arga      | Irañeta                | n/d                 | D           | n/d         | n/d         | n/d         | 6           |
| Queiles River             | Arga      | Novallas               | D                   | D           | D           | 3           | n/d         | 4           |
| Alhama River              | Alhama    | Alfaro                 | D                   | n/d         | D           | n/d         | n/d         | 2           |
| Ega River                 | Ega       | Estella                | D                   | n/d         | n/d         | n/d         | n/d         | 1           |
| Ega River                 | Ega       | Estella                | n/d                 | D           | D           | n/d         | n/d         | 1           |
| Arga River                | Arga      | Arazuri                | n/d                 | D           | D           | n/d         | n/d         | 1           |
| Arga River                | Arga      | Ororbia                | 10                  | D           | 189         |             | n/d         | 16          |
| Ebro River                | Ebro      | Fontellas              | D                   | D           | n/d         | n/d         | n/d         | 96          |
| Ebro River                | Ebro      | Tudela                 | n/d                 | D           | n/d         | 4           | n/d         | 23          |

It should be taken in account that spring 2020 sampling campaign was postponed to autumn 2020 as a result of COVID-19.

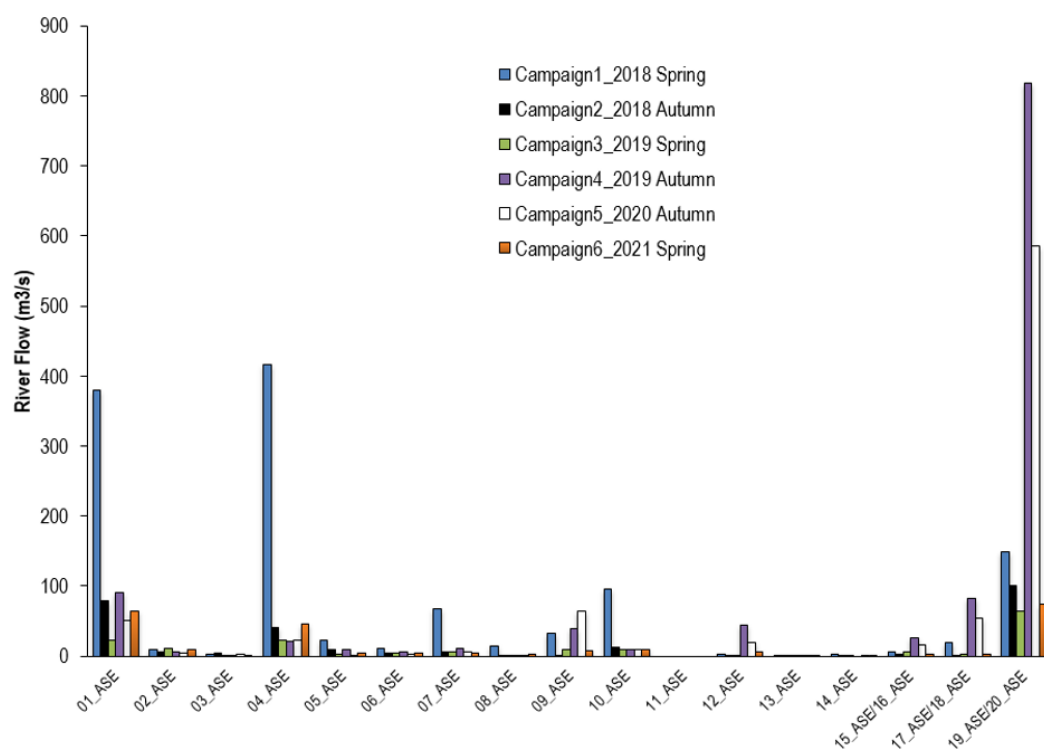

**Figure S1.** River flow during the six sampling campaigns 2018–2021.

**Table S5.** One-way ANOVA test of antibiotics concentration in high-livestock-pressure points.

| Sources of Variation | Sum of Squares | Degree of Freedom | Mean Square | Factor F    | p-Value |
|----------------------|----------------|-------------------|-------------|-------------|---------|
| Between antibiotics  | 88,463         | 3                 | 294,876,667 | F = 4.41669 | 0.009 * |
| Within antibiotics   | 2,670,569,091  | 40                | 66,764,227  |             |         |
| Total                | 3,555,199,091  | 43                |             |             |         |

\* significant at  $p < 0.05$ .**Table S6.** Tukey's honestly significant difference test results in high-livestock pressure points.

| Pairwise Comparisons | HSD.05 = 93.3888<br>HSD.01 = 115.6699 |        | Q.05 = 3.790<br>Q.01 = 4.695      |
|----------------------|---------------------------------------|--------|-----------------------------------|
|                      |                                       |        |                                   |
| SDZ:ENR              | M1 = 25.91<br>M2 = 114.09             | 88.18  | Q = 3.58 ( $p$ -value = 0.070) ** |
| SDZ:TMT              | M1 = 25.91<br>M3 = 10.73              | 15.18  | Q = 0.62 ( $p$ -value = 0.971)    |
| SDZ:AZI              | M1 = 25.91<br>M4 = 1.09               | 24.82  | Q = 1.01 ( $p$ -value = 0.892)    |
| ENR:TMT              | M2 = 114.09<br>M3 = 10.73             | 103.36 | Q = 4.20 ( $p$ -value = 0.025) ** |
| ENR:AZI              | M2 = 114.09<br>M4 = 1.09              | 113.00 | Q = 4.59 ( $p$ -value = 0.012) ** |
| AZI:TMT              | M3 = 10.73<br>M4 = 1.09               | 9.64   | Q = 0.39 ( $p$ -value = 0.992)    |

\*\* significant at  $p < 0.05$ . M = mean, Q = Studentized range distribution statistic, HSD = honestly significant difference**Table S7.** One-way ANOVA test of sulfadiazine concentration between the reference point ASE19 and the points exposed to high and medium livestock pressure.

|                    | Sum of Squares | Degree of Freedom | Mean Square | Factor F    | p-Value |
|--------------------|----------------|-------------------|-------------|-------------|---------|
| Between-treatments | 82,990,139     | 1                 | 82,990,139  | F = 5.24636 | 0.032 * |
| Within-treatments  | 348,009,444    | 22                | 15,818,611  |             |         |
| Total              | 430,999,583    | 23                |             |             |         |

\* significant at  $p < 0.05$ .**Table S8.** One-way ANOVA test of antibiotics concentration in WWTPs.

| Sources of Variation | Sum of Squares  | Degree of Freedom | Mean Square    | Factor F    | p-Value |
|----------------------|-----------------|-------------------|----------------|-------------|---------|
| Between antibiotics  | 353,593,698,419 | 3                 | 11,786,456,614 | F = 9.49363 | 0.009 * |
| Within antibiotics   | 434,529,413,889 | 35                | 12,415,126,111 |             |         |
| Total                | 788,123,112,308 | 38                |                |             |         |

\* significant at  $p < 0.05$ .

**Table S9.** Tukey's honestly significant difference test results in WWTPs.

| Pairwise Comparisons |                           | HSD.05 = 1,362.4039 | Q.05 = 3.8140                |
|----------------------|---------------------------|---------------------|------------------------------|
|                      |                           | HSD.01 = 1,692.9315 | Q.01 = 4.7393                |
| SDZ:ENR              | M <sub>1</sub> = 181.20   | 186.30              | Q = 0.52 ( $p = 0.98259$ )   |
|                      | M <sub>2</sub> = 367.50   |                     |                              |
| SDZ:TMT              | M <sub>1</sub> = 181.20   | 602.91              | Q = 1.69 ( $p = 0.63495$ )   |
|                      | M <sub>3</sub> = 784.11   |                     |                              |
| SDZ:AZI              | M <sub>1</sub> = 181.20   | 2,376.20            | Q = 6.65 ( $p = 0.00022$ ) * |
|                      | M <sub>4</sub> = 2,557.40 |                     |                              |
| ENR:TMT              | M <sub>2</sub> = 367.50   | 416.61              | Q = 1.17 ( $p = 0.84239$ )   |
|                      | M <sub>3</sub> = 784.11   |                     |                              |
| ENR:AZI              | M <sub>2</sub> = 367.50   | 2,189.90            | Q = 6.13 ( $p = 0.00065$ ) * |
|                      | M <sub>4</sub> = 2,557.40 |                     |                              |
| AZI:TMT              | M <sub>3</sub> = 784.11   | 1,773.29            | Q = 4.96 ( $p = 0.00656$ ) * |
|                      | M <sub>4</sub> = 2,557.40 |                     |                              |

\* significant at  $p < 0.05$ . M = mean, Q = Studentized range distribution statistic, HSD= honestly significant difference.
